# Supplementary material
Source: ML conference proceedings conference paper supplement (https://openaccess.thecvf.com/content/CVPR2024/html/Chen_CA-Jaccard_Camera-aware_Jaccard_CVPR_2024_paper.html)
Supplement: Supplementary file 1 [file Chen_CA-Jaccard_Camera-aware_Jaccard_CVPR_2024_supplemental.pdf]

# CA-Jaccard: Camera-aware Jaccard Distance for Person Re-identification

## Supplementary Material

### 6. The Computation Details of CA-Jaccard Distance

Alg. 1 delineates the whole computation steps for CA-Jaccard distance. First, extract features of all samples by model  $f_\theta$  and calculate the original distance matrix  $D$ . Then, find CKRNNs by applying k-reciprocal constraint in intra-camera and inter-camera ranking lists. Next, turn these CKRNNs of samples into weighted CKRNNs vectors. Subsequently, use CLQE to obtain the weighted neighbors vectors. Finally, CA-Jaccard distance matrix  $D^{CAJ}$  is computed by the overlap between weighted expanded neighbors vectors of samples.

---

**Algorithm 1** The computation procedures of CA-Jaccard distance

---

**Input:** Dataset  $X = \{x_i\}_{i=1}^N$  with camera labels  $\{c_i\}_{i=1}^N$ , model  $f_\theta$ ;

**Output:** Jaccard distance matrix  $D^{CAJ}$ ;

- 1: Extract features from  $X$  by the model  $f_\theta$ ;
  - 2: // CA-Jaccard distance computation steps
  - 3: // Step 1: Original distance computation
  - 4: Calculate original distance matrix  $D$ ;
  - 5: // Step 2: CKRNNs
  - 6: Find CKRNNs with Eq. 11;
  - 7: // Step 3: Vectorization of neighbors
  - 8: Encode CKRNNs into weighted CKRNNs vectors with Eq. 4;
  - 9: // Step 4: CLQE
  - 10: Use CLQE (Eq. 12) to obtain weighted expanded neighbors vectors
  - 11: // Step 5: Overlap computation
  - 12: Compute the CA-Jaccard distance matrix  $D^{CAJ}$  with Eq. 6;
- 

### 7. Additional Visualizations

Some additional visualizations are presented to further verify the effectiveness of CA-Jaccard distance.

**Clustering scene.** We visualize the distance distribution of intra-camera and inter-camera positive pairs for two datasets in Fig. 7. As shown in Fig. 7, compared to baseline, our CA-Jaccard distance significantly reduces the difference between distribution of intra-camera and inter-camera positive pairs for both datasets. These observations further verify the effectiveness and reliability of our CA-Jaccard distance.

**Re-ranking scene.** More retrieval results are visualized in Fig. 8. CA-Jaccard distance effectively ranks more positive samples into the top of ranking list which are absent in the ranking lists of BoT and BoT+KR. These findings indicate that CA-Jaccard distance metric can produce more accurate distances.

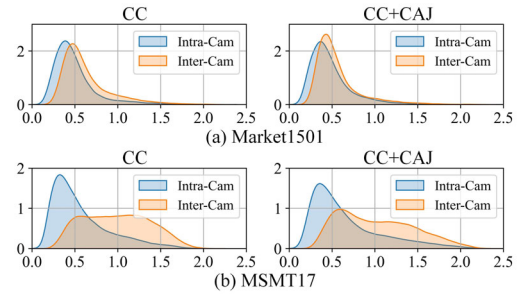

Figure 7. Distance distributions of intra-camera and inter-camera positive pairs on (a) Market1501 and (b) MSMT17.

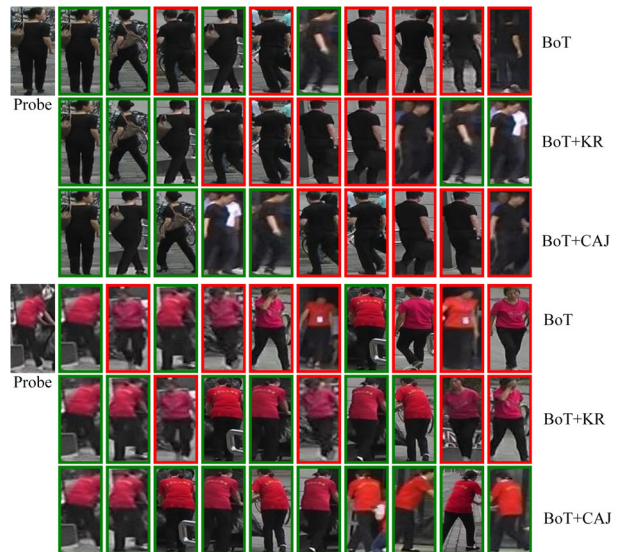

Figure 8. More retrieval results on the Market1501 dataset. For each probe, the first, second, and third rows correspond to the ranking results produced by BoT, BoT+KR, and BoT+CAJ respectively. The person surrounded by a green box represents the same person as the probe, while the person surrounded by a red border represents a different person from the probe image.
